# Supplementary material
Source: HighWire-hosted journal article supplement (https://drc.bmj.com/content/7/1/e000602)
Supplement: inline-supplementary-material-1 [file inline-supplementary-material-1.docx]

**Online-Only Supplemental Material**

This appendix has been provided by the authors to give readers additional information about their work.

Supplement to:

**The Excess Risk of Lower Extremity Amputations in Persons with Type 1 Diabetes compared to the General Population.**

Arndís Finna Ólafsdóttir R.N., Pg.D., Department of Medicine, NU Hospital Group, Uddevalla, Sweden and Department of Molecular and Clinical Medicine, University of Gothenburg, Gothenburg, Sweden

Ann-Marie Svensson Ph.D., Center of Registers in Region Västra Götaland

Aldina Pivodic MSc, Statistiska Konsultgruppen, Gothenburg, Sweden

Soffía Gudbjörnsdottir M.D., Ph.D.,Department of Molecular and Clinical Medicine, University of Gothenburg, Gothenburg, Sweden

Thomas Nyström M.D., Ph.D., Department of Clinical Science and Education, Södersjukhuset, Karolinska Institutet, Stockholm, Sweden

Hans Wedel Ph.D.,Health Metrics Sahlgrenska Academy at University of Gothenburg, Sweden

Annika Rosengren M.D., Ph.D., Department of Molecular and Clinical Medicine, University of Gothenburg, Gothenburg, Sweden

Marcus Lind M.D., Ph.D., Department of Molecular and Clinical Medicine, Institute of Medicine, University of Gothenburg, Gothenburg, Sweden and Department of Medicine, NU-Hospital Group, Uddevalla, Sweden

# *Table of contents*

[*1.* *Table of contents* 2](#_Toc529777722)

[*2.* *Supplement Figure 1 - Patient Flow Chart* 4](#_Toc529777723)

[*3.* *ICD codes* 5](#_Toc529777724)

[*4.* *The SAS code for a time-updated Cox regression:* 6](#_Toc529777725)

[*5.* *Supplement Table 1. Baseline characteristics of persons with type 1 diabetes and their controls with no prior amputation by categories of HbA1c at first inclusion in the register in 1998-2013* 7](#_Toc529777726)

[*6 Supplemental Table 2. Distribution of age by gender and calendar periods* 11](#_Toc529777727)

[*7 Supplemental Table 3. Standardized (for age and sex in first period) event rates with 95% CI per 1000 patient years for any amputation, below ankle and above ankle for diabetes patients and controls, by calendar periods.* 12](#_Toc529777728)

[*8 Supplemental Table 4. Adjusted HR (95% CI) for time to first amputation for T1D vs Controls by calendar period and within diabetes cohort, analysis done from model 3 and evaluated by Cox regression.* 13](#_Toc529777729)

[*9 Supplement Table 5. All models - Hazard ratios for all amputations and 95% confidence intervals for Type 1DM versus the reference group, time-updated mean HbA1c categories, albuminuria categories and eGFR categories examined by Cox regression* 16](#_Toc529777730)

[*10 Supplement Table 6. All models Adjusted hazard ratios for all Amputation and 95% confidence intervals for time-updated mean HbA1c categories and Normoalbuminuria versus the reference group examined by Cox regression* 19](#_Toc529777731)

[*11.* *Supplement Table 7*. *All models Adjusted hazard ratio of all amputations for persons with type 1DM versus controls and 95% confidence intervals for time-updated mean HbA1c categories and coexisting normoalbuminuria and eGFR>60 ml/min.* 21](#_Toc529777732)

[*12.* *Supplement Table 8. All models - Hazard ratios for minor amputations and 95% confidence intervals for people with type 1DM versus controls, time-updated mean HbA1c categories, albuminuria categories and eGFR categories examined by Cox regression* 23](#_Toc529777733)

[*13.* *Supplement Table 9. All models - Hazard ratios for major amputations and 95% confidence intervals for people with Type 1DM versus controls, time-updated mean HbA1c categories, albuminuria categories and eGFR categories examined by Cox regression* 26](#_Toc529777734)

[*14.* *Supplement Table 10. Adjusted hazard ratios for minor amputation and 95% confidence intervals for time-updated mean HbA1c categories and Normoalbuminuria versus controls examined by Cox regression* 29](#_Toc529777735)

[*15.* *Supplement Table 11. Adjusted hazard ratios for Minor amputation and 95% confidence intervals for time-updated mean HbA1c categories and eGFR<60/>=60 categories versus controls examined by Cox regression* 31](#_Toc529777736)

[*16.* *Supplement Table 12. Adjusted hazard ratios for Major amputation and 95% confidence intervals for time-updated mean HbA1c categories and Normoalbuminuria versus controls examined by Cox regression* 33](#_Toc529777737)

[*17.* *Supplement Table 13. Adjusted hazard ratios for Major amputation and 95% confidence intervals for time-updated mean HbA1c categories and eGFR<60/>=60 categories versus the reference group examined by Cox regression* 35](#_Toc529777738)

# *Supplement Figure 1 - Patient Flow Chart*

| **Type 1 DM** |  |  | **Controls** |  |
| --- | --- | --- | --- | --- |
| Total number of Patients from NDR | 36,872 |  | Matched Controls | 184,360 |
|  |  |  | Death before study start  237 | 184,123 |
| Death before study start  4 | 36,868 |  | Their controls  20 | 184,103 |
|  |  |  | Amputation before study start  38 | 184,065 |
| Amputations before study start  291 | 36,577 | 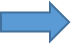 | Their controls  1448 | 182,617 |
| **Total** | **36,577** |  | **Total** | **182,617** |
|  |  |  |  |  |

# *ICD codes*

The following ICD-9 and ICD-10 codes were collected:

coronary heart disease: 410-414 (ICD-9), I20-I25 (ICD-10) (including acute myocardial infarction: 410, I21);

stroke (431-434, 436; I61-I64);

hospitalization for heart failure (428; I50);

atrial fibrillation (427D; I48);

valve disease (394-396, 424, 746; I05-I09, I34-I37, Q22-Q23);

foot ulcer (operation code 250G; ICD10 E10.5, E11.5, E12.5, E13.5, E14.5); and cancer (140-208; C00-C97).

For renal dialysis and transplantation, the following codes were used: V42A, V45B, V56A, V56W (ICD-9) and Z94.0, Z49, Z99.2 (ICD-10).

All events were collected from the inpatient register except for atrial fibrillation that was collected both from inpatient and outpatient register.

# *The SAS code for a time-updated Cox regression:*

PROC PHREG DATA = *data*;

CLASS *mainvar* / REF = LAST;

MODEL (*startyr*,*stopyr*)**endpsplit*(0) = *mainvar* *&covars.* / RL;

RUN;

The dataset *data* is split up for each patient by consecutive time periods between *startyr*-*stopyr* given in years from start of study (first visit date in NDR). For each new value of any variable that is studied as time-updated in the model, there is a new observation for that patient starting with *startyr* and stopping with *stopyr* that is either a new updated value or the last updated timepoint ending up in an amputation event or a censoring event. *Endpsplit* is 0 for all consecutive observations unless it is the last observation, i.e. the last time period, where it is either 0 if censoring or 1 if the studied event has occurred at the end of that time interval (*stopyr*). *Mainvar* is for example time-updated HbA1c category with last category corresponding to controls. *&covars.* is a macro-variable including all adjustment variables, e.g. *ageupd sex* with time-updated age and sex in model 1.

SAS software link with an example: <http://support.sas.com/documentation/cdl/en/statug/63033/HTML/default/viewer.htm#statug_phreg_sect038.htm>

# *Supplement Table 1. Baseline characteristics of persons with type 1 diabetes and their controls with no prior amputation by categories of HbA1c at first inclusion in the register in 1998-2013*

|  | | | **HbA1c categories at baseline (NGSP % / IFCC mmol/mol)** | | | | | |
| --- | --- | --- | --- | --- | --- | --- | --- | --- |
|  | **Controls** **n=182617** | **All Type I diabetes** **n=36577** | **≤6.9%** **(≤52 mmol/mol)** **n=5867** | **7.0-7.8%** **(53-62 mmol/mol)** **n=9687** | **7.9-8.7%** **(63-72 mmol/mol)** **n=10414** | **8.8-9.6%** **(73-82 mmol/mol)** **n=6005** | **≥9.7%** **(≥83 mmol/mol)** **n=4367** | **Missing value** **n=237** |
| **Women** | 82738 (45.3%) | 16567 (45.3%) | 2603 (44.4%) | 4286 (44.2%) | 4714 (45.3%) | 2733 (45.5%) | 2130 (48.8%) | 101 (42.6%) |
| **Age (years)** | 35.2 (14.6) n=182617 | 35.2 (14.6) n=36577 | 35.3 (15.2) n=5867 | 36.1 (14.8) n=9687 | 35.8 (14.5) n=10414 | 34.9 (14.1) n=6005 | 32.3 (13.5) n=4367 | 30.4 (14.4) n=237 |
| **Age category** |  |  |  |  |  |  |  |  |
| **18-34** | 102427 (56.1%) | 20495 (56.0%) | 3444 (58.7%) | 5200 (53.7%) | 5600 (53.8%) | 3307 (55.1%) | 2774 (63.5%) | 170 (71.7%) |
| **35-49** | 45377 (24.8%) | 9083 (24.8%) | 1161 (19.8%) | 2412 (24.9%) | 2717 (26.1%) | 1679 (28.0%) | 1074 (24.6%) | 40 (16.9%) |
| **50-64** | 27588 (15.1%) | 5533 (15.1%) | 977 (16.7%) | 1646 (17.0%) | 1676 (16.1%) | 819 (13.6%) | 397 (9.1%) | 18 (7.6%) |
| **65+** | 7225 (4.0%) | 1466 (4.0%) | 285 (4.9%) | 429 (4.4%) | 421 (4.0%) | 200 (3.3%) | 122 (2.8%) | 9 (3.8%) |
| **Born in Sweden** | 158353 (86.7%) | 34028 (93.0%) | 5433 (92.6%) | 9065 (93.6%) | 9776 (93.9%) | 5570 (92.8%) | 3997 (91.5%) | 187 (78.9%) |
| **Education category** |  |  |  |  |  |  |  |  |
| **Low** | 38640 (21.5%) | 8091 (22.4%) | 1069 (18.5%) | 1833 (19.2%) | 2229 (21.6%) | 1515 (25.6%) | 1357 (31.6%) | 88 (39.1%) |
| **Mid** | 92477 (51.6%) | 19378 (53.7%) | 2916 (50.3%) | 4995 (52.2%) | 5656 (54.9%) | 3306 (55.9%) | 2398 (55.9%) | 107 (47.6%) |
| **High** | 48234 (26.9%) | 8629 (23.9%) | 1807 (31.2%) | 2738 (28.6%) | 2420 (23.5%) | 1097 (18.5%) | 537 (12.5%) | 30 (13.3%) |
| ***Variables in the National Diabetes Regiser only*** |  |  |  |  |  |  |  |  |
| **HbA1c (mmol/mol, IFCC)** |  | 66.1 (14.7) n=36340 | 46.7 (4.9) n=5867 | 57.7 (2.7) n=9687 | 67.1 (2.8) n=10414 | 76.9 (2.8) n=6005 | 94.1 (10.9) n=4367 |  |
| **HbA1c (%, NGSP)** |  | 8.20 (1.35) n=36340 | 6.42 (0.45) n=5867 | 7.43 (0.24) n=9687 | 8.29 (0.26) n=10414 | 9.18 (0.26) n=6005 | 10.8 (1.0) n=4367 |  |
| **Diabetes duration (years)** |  | 19.9 (14.7) n=36577 | 18.6 (16.2) n=5867 | 20.8 (15.0) n=9687 | 20.8 (14.3) n=10414 | 19.9 (13.7) n=6005 | 17.7 (13.1) n=4367 | 13.4 (14.5) n=237 |
| **Insulin method** |  |  |  |  |  |  |  |  |
| **Injection** |  | 27972 (80.3%) | 4693 (84.1%) | 7430 (79.4%) | 7837 (78.8%) | 4519 (79.5%) | 3352 (82.2%) | 141 (83.4%) |
| **Pump** |  | 6841 (19.7%) | 886 (15.9%) | 1928 (20.6%) | 2108 (21.2%) | 1163 (20.5%) | 728 (17.8%) | 28 (16.6%) |
| **BMI (kg/m2)** |  | 25.9 (4.6) n=35343 | 25.2 (4.4) n=5639 | 25.7 (4.2) n=9460 | 26.2 (4.5) n=10149 | 26.5 (4.7) n=5838 | 25.8 (5.2) n=4149 | 26.0 (4.9) n=108 |
| **LDL (mmol/L)** |  | 2.63 (0.82) n=33009 | 2.52 (0.78) n=5265 | 2.57 (0.77) n=9015 | 2.62 (0.80) n=9571 | 2.70 (0.83) n=5405 | 2.83 (0.94) n=3721 | 2.71 (0.99) n=32 |
| **Systolic BP (mmHg)** |  | 126.1 (15.7) n=36121 | 124.7 (15.4) n=5786 | 125.7 (15.3) n=9618 | 126.6 (15.6) n=10324 | 127.3 (15.9) n=5965 | 126.2 (16.8) n=4287 | 123.4 (17.9) n=141 |
| **Diastolic BP (mmHg)** |  | 72.6 (9.3) n=36121 | 71.7 (9.0) n=5786 | 71.7 (9.2) n=9618 | 72.6 (9.1) n=10324 | 73.5 (9.4) n=5965 | 74.4 (9.7) n=4287 | 73.2 (10.1) n=141 |
| **Smoking** |  | 4435 (12.3%) | 468 (8.1%) | 880 (9.2%) | 1194 (11.6%) | 915 (15.4%) | 945 (22.2%) | 33 (21.6%) |
| **Blood pressure lowering medication** |  | 14171 (39.3%) | 1950 (33.9%) | 3791 (39.6%) | 4222 (41.0%) | 2535 (42.7%) | 1644 (38.4%) | 29 (15.1%) |
| **Lipid lowering medication** |  | 12978 (35.9%) | 1645 (28.5%) | 3506 (36.5%) | 3997 (38.7%) | 2397 (40.3%) | 1416 (32.9%) | 17 (8.7%) |
| **eGFR** |  | 93.5 (31.6) n=34328 | 91.0 (32.9) n=5513 | 91.2 (29.9) n=9283 | 92.8 (28.0) n=9881 | 94.9 (33.3) n=5629 | 101.5 (37.3) n=3973 | 101.9 (42.8) n=49 |
| **Albuminuria** |  |  |  |  |  |  |  |  |
| **Normoalbuminuria** |  | 26797 (80.0%) | 4597 (85.4%) | 7582 (83.0%) | 7841 (80.9%) | 4137 (75.3%) | 2613 (69.3%) | 27 (71.1%) |
| **Microalbuminuria** |  | 3796 (11.3%) | 366 (6.8%) | 860 (9.4%) | 1110 (11.5%) | 795 (14.5%) | 664 (17.6%) | 1 (2.6%) |
| **Macroalbuminuria** |  | 2117 (6.3%) | 249 (4.6%) | 473 (5.2%) | 551 (5.7%) | 451 (8.2%) | 390 (10.3%) | 3 (7.9%) |
| **CKD stage 5** |  | 794 (2.4%) | 172 (3.2%) | 215 (2.4%) | 186 (1.9%) | 108 (2.0%) | 106 (2.8%) | 7 (18.4%) |
| ***Registrations in the InPatient Register prior to baseline*** |  |  |  |  |  |  |  |  |
| **Acute Myocardial Infarction (I21)** | 835 (0.5%) | 808 (2.2%) | 99 (1.7%) | 223 (2.3%) | 232 (2.2%) | 150 (2.5%) | 102 (2.3%) | 2 (0.8%) |
| **Atrial Fibrillation (I48)** | 811 (0.4%) | 215 (0.6%) | 38 (0.6%) | 57 (0.6%) | 73 (0.7%) | 26 (0.4%) | 18 (0.4%) | 3 (1.3%) |
| **Coronary Heart Disease (I20-I25)** | 1667 (0.9%) | 1605 (4.4%) | 229 (3.9%) | 435 (4.5%) | 449 (4.3%) | 275 (4.6%) | 209 (4.8%) | 8 (3.4%) |
| **Heart Failure (I50)** | 438 (0.2%) | 491 (1.3%) | 74 (1.3%) | 124 (1.3%) | 143 (1.4%) | 83 (1.4%) | 60 (1.4%) | 7 (3.0%) |
| **Valve disease (I05-I09,I34-I36)** | 359 (0.2%) | 134 (0.4%) | 16 (0.3%) | 24 (0.2%) | 42 (0.4%) | 26 (0.4%) | 20 (0.5%) | 6 (2.5%) |
| **Stroke (I61-I64)** | 726 (0.4%) | 548 (1.5%) | 80 (1.4%) | 132 (1.4%) | 168 (1.6%) | 88 (1.5%) | 77 (1.8%) | 3 (1.3%) |
| **Cancer (C00-C97)** | 2093 (1.1%) | 515 (1.4%) | 100 (1.7%) | 143 (1.5%) | 153 (1.5%) | 69 (1.1%) | 48 (1.1%) | 2 (0.8%) |
| **Foot ulcer (circulatory complications) (E10.5,E11.5,E12.5,E13.5,E14.5)** | 17 (0.0%) | 1349 (3.7%) | 182 (3.1%) | 318 (3.3%) | 384 (3.7%) | 264 (4.4%) | 195 (4.5%) | 6 (2.5%) |
| For categorical variables n (%) is presented. For continuous variables Mean (SD) is presented. | | | | | | | | |

# *6 Supplemental Table 2. Distribution of age by gender and calendar periods*

| **Gender** | **Calendar period** | **Mean (SD)** **at risk n=** |
| --- | --- | --- |
| **Men** | 1998-2001 | 39·9 (13·0)  n=8350 |
| 2002-2004 | 40·5 (13·5) n=11738 |
| 2005-2007 | 41·0 (14·0) n=14386 |
| 2008-2010 | 40·8 (14·8) n=16548 |
| 2011-2013 | 41·3 (15·2) n=18245 |
| **Women** | 1998-2001 | 40·3 (13·3)  n=7071 |
| 2002-2004 | 41·1 (13·8) n=9868 |
| 2005-2007 | 41·6 (14·5) n=12190 |
| 2008-2010 | 41·6 (15·2) n=14022 |
| 2011-2013 | 42·3 (15·6) n=15369 |

# *7 Supplemental Table 3. Standardized (for age and sex in first period) event rates with 95% CI per 1000 patient years for any amputation, below ankle and above ankle for diabetes patients and controls, by calendar periods.*

| **Event** | **Population** | **1998-2001** | **2002-2004** | **2005-2007** | **2008-2010** | **2011-2013** |
| --- | --- | --- | --- | --- | --- | --- |
| **All amputations** | **All diabetes patients** | 3.09 (2.56-3.62) | 3.31 (2.85-3.77) | 3.04 (2.65-3.42) | 2.50 (2.19-2.82) | 2.64 (2.31-2.98) |
|  | **diabetes patients, Men** | 3.82 (3.02-4.63) | 3.74 (3.08-4.41) | 3.79 (3.21-4.38) | 3.24 (2.75-3.74) | 3.23 (2.72-3.74) |
|  | **diabetes patients, Women** | 2.24 (1.58-2.90) | 2.80 (2.17-3.43) | 2.16 (1.68-2.64) | 1.65 (1.27-2.02) | 1.97 (1.54-2.39) |
|  | **Controls** | 0.05 (0.02-0.09) | 0.06 (0.03-0.08) | 0.05 (0.03-0.07) | 0.05 (0.03-0.07) | 0.04 (0.02-0.06) |
| **Minor amputations** | **All diabetes patients** | 1.62 (1.23-2.00) | 1.93 (1.58-2.28) | 1.87 (1.57-2.17) | 1.58 (1.32-1.83) | 1.79 (1.51-2.07) |
|  | **diabetes patients, Men** | 2.00 (1.42-2.58) | 2.29 (1.76-2.81) | 2.44 (1.97-2.91) | 2.16 (1.75-2.57) | 2.47 (2.02-2.92) |
|  | **diabetes patients, Women** | 1.16 (0.69-1.64) | 1.52 (1.05-1.98) | 1.21 (0.85-1.57) | 0.90 (0.62-1.19) | 1.00 (0.69-1.30) |
|  | **Controls** | 0.01 (-0.00-0.03) | 0.01 (0.00-0.02) | 0.01 (0.00-0.02) | 0.02 (0.01-0.03) | 0.01 (0.00-0.02) |
| **Major amputations** | **All diabetes patients** | 1.84 (1.43-2.25) | 1.92 (1.57-2.26) | 1.65 (1.37-1.93) | 1.40 (1.17-1.63) | 1.50 (1.25-1.74) |
|  | **diabetes patients, Men** | 2.29 (1.66-2.91) | 2.16 (1.65-2.66) | 1.99 (1.57-2.41) | 1.71 (1.36-2.06) | 1.66 (1.31-2.01) |
|  | **diabetes patients, Women** | 1.32 (0.81-1.83) | 1.64 (1.16-2.11) | 1.27 (0.90-1.63) | 1.04 (0.75-1.34) | 1.31 (0.97-1.65) |
|  | **Controls** | 0.05 (0.02-0.07) | 0.05 (0.02-0.07) | 0.04 (0.02-0.05) | 0.03 (0.02-0.04) | 0.03 (0.01-0.04) |

# *8 Supplemental Table 4. Adjusted HR (95% CI) for time to first amputation for T1D vs Controls by calendar period and within diabetes cohort, analysis done from model 3 and evaluated by Cox regression.*

| **Cohort** | **Calendar period/Comparison** | **HR (95% CI)** **p-value** | **p-value for interaction Group*Calendar period** |  | | |
| --- | --- | --- | --- | --- | --- | --- |
| **Any amputations** | | | |  | | |
| **Type 1DM vs Controls** | **1998-2001** | 34·8 (17·5-69·3) | 0.74 |  | | |
|  | **2002-2004** | 30·4 (18·6-49·7) |  |  | | |
|  | **2005-2007** | 24·1 (15·9-36·5) |  |  | | |
|  | **2008-2010** | 27·1 (18·0-40·9) |  |  | | |
|  | **2011-2013** | 22·4 (15·6-32·0) |  |  | | |
| **Type 1DM cohort** | **2002-2004 vs 1998-2001** | 1·03 (0·79-1·34) p=0·83 |  |  | | |
|  | **2005-2007 vs 1998-2001** | 0·87 (0·66-1·14) p=0·31 |  |  | | |
|  | **2008-2010 vs 1998-2001** | 0·81 (0·61-1·08) p=0·15 |  |  | | |
|  | **2011-2013 vs 1998-2001** | 0·75 (0·56-1·01) p=0·060 |  |  | | |
| **Type 1DM vs Controls** | **1998-2003** | 39·1 (24·3-63·0) | 0.46 |  | | |
|  | **2004-2008** | 28·4 (20·5-39·3) |  |  | | |
|  | **2009-2013** | 28·0 (20·9-37·7) |  |  | | |
| **Type 1DM cohort** | **2004-2008 vs 1998-2003** | 0·87 (0·72-1·06) p=0·17 |  |  | | |
|  | **2009-2013 vs 1998-2003** | 0·75 (0·61-0·94) p=0·011 |  |  | | |
| **Minor Amputations** | | | |  | | |
| **Type 1DM vs Controls** | **1998-2001** | 51.7 (16.0-167.2) | 0.65 |  | | |
|  | **2002-2004** | 113.4 (35.8-359.4) |  |  | | |
|  | **2005-2007** | 50.8 (24.7-104.5) |  |  | | |
|  | **2008-2010** | 71.5 (31.4-162.9) |  |  | | |
|  | **2011-2013** | 44.4 (24.5-80.4) |  |  | | |
| **Type 1DM cohort** | **2002-2004 vs 1998-2001** | 1.29 (0.89-1.87) p=0.18 |  |  | | |
|  | **2005-2007 vs 1998-2001** | 1.12 (0.77-1.63) p=0.56 |  |  | | |
|  | **2008-2010 vs 1998-2001** | 0.96 (0.65-1.42) p=0.84 |  |  | | |
|  | **2011-2013 vs 1998-2001** | 0.96 (0.66-1.48) p=0.96 |  |  | | |
| **Type 1DM vs Controls** | **1998-2003** | 67.2 (29.3-154.1) | 0.62 |  |  |  |
|  | **2004-2008** | 84.5 (43.0-165.9) |  |  |  |  |
|  | **2009-2013** | 56.1 (34.0-92.4) |  |  |  |  |
| **Type 1DM cohort** | **2004-2008 vs 1998-2003** | 0.98 (0.76-1.27) p=0.89 |  |  | | |
|  | **2009-2013 vs 1998-2003** | 0.88 (0.66-1.17) p=0.37 |  |  | | |
| **Major Amputations** | | | |  | | |
| **Type 1DM vs Controls** | **1998-2001** | 26.0 (11.8-57.3) | 0.85 |  | | |
|  | **2002-2004** | 17.9 (10.3-31.1) |  |  | | |
|  | **2005-2007** | 15.4 (9.4-25.3) |  |  | | |
|  | **2008-2010** | 16.5 (10.4-26.5) |  |  | | |
|  | **2011-2013** | 16.3 (10.4-25.6) |  |  | | |
| **Type 1DM cohort** | **2002-2004 vs 1998-2001** | 0.83 (0.59-1.18) p=0.29 |  |  | | |
|  | **2005-2007 vs 1998-2001** | 0.67 (0.47-0.96) p=0.028 |  |  | | |
|  | **2008-2010 vs 1998-2001** | 0.66 (0.46-0.94) p=0.023 |  |  | | |
|  | **2011-2013 vs 1998-2001** | 0.57 (0.39-0.84) p=0.0045 |  |  | | |
| **Type 1DM vs Controls** | **1998-2003** | 30.6 (17.5-53.5) | 0.18 |  |  |  |
|  | **2004-2008** | 16.6 (11.5-23.9) |  |  |  |  |
|  | **2009-2013** | 21.4 (14.8-30.8) |  |  |  |  |
| **Type 1DM cohort** | **2004-2008 vs 1998-2003** | 0.72 (0.55-0.92) p=0.010 |  |  | | |
|  | **2009-2013 vs 1998-2003** | 0.62 (0.46-0.82) p=0.0010 |  |  | | |

# *9 Supplement Table 5. All models - Hazard ratios for all amputations and 95% confidence intervals for Type 1DM versus the reference group, time-updated mean HbA1c categories, albuminuria categories and eGFR categories examined by Cox regression*

|  | **Hazard ratio (95% CI)** **p-value** | | | | | | | | |
| --- | --- | --- | --- | --- | --- | --- | --- | --- | --- |
|  | **Model 1** | **Model 2** | | | | **Model 3** | | | |
| **Amputation** | **All** | **Diabetes duration 30 years** | **Diabetes duration 40 years** | **Diabetes duration 50 years** | **Diabetes duration 60 years** | **Diabetes duration 30 years** | **Diabetes duration 40 years** | **Diabetes duration 50 years** | **Diabetes duration 60 years** |
|  |  |  |  |  |  |  |  |  |  |
| **Controls (reference)** | 1.00 | 1.00 | 1.00 | 1.00 | 1.00 | 1.00 | 1.00 | 1.00 | 1.00 |
| **Group All Type I diabetes with no prior amputation** | 53.6 (44.3 - 64.8) <.0001 | 39.3 (32.1 - 48.1) <.0001 | 51.7 (42.7 - 62.5) <.0001 | 67.9 (55.5 - 83.2) <.0001 | 89.3 (70.7 - 112.9) <.0001 | 31.5 (25.6 - 38.8) <.0001 | 38.0 (31.1 - 46.3) <.0001 | 45.7 (37.0 - 56.6) <.0001 | 55.1 (43.1 - 70.5) <.0001 |
|  |  |  |  |  |  |  |  |  |  |
| **Controls (reference)** | 1.00 | 1.00 | 1.00 | 1.00 | 1.00 | 1.00 | 1.00 | 1.00 | 1.00 |
| **<=52 mmol/mol (<=6.9%)** | 19.5 (14.4 - 26.6) <.0001 | 13.0 (9.5 - 17.9) <.0001 | 17.8 (13.0 - 24.2) <.0001 | 24.2 (17.7 - 33.1) <.0001 | 33.0 (23.6 - 45.9) <.0001 | 11.8 (8.5 - 16.3) <.0001 | 14.8 (10.8 - 20.2) <.0001 | 18.5 (13.4 - 25.5) <.0001 | 23.2 (16.4 - 32.6) <.0001 |
| **53-62 mmol/mol (7.0-7.8%)** | 32.8 (26.2 - 41.1) <.0001 | 21.8 (17.1 - 27.7) <.0001 | 29.7 (23.7 - 37.3) <.0001 | 40.5 (32.1 - 51.1) <.0001 | 55.1 (42.6 - 71.3) <.0001 | 18.6 (14.6 - 23.7) <.0001 | 23.3 (18.5 - 29.4) <.0001 | 29.2 (22.9 - 37.1) <.0001 | 36.5 (28.0 - 47.8) <.0001 |
| **63-72 mmol/mol (7.9-8.7%)** | 50.0 (40.5 - 61.9) <.0001 | 34.0 (27.1 - 42.6) <.0001 | 46.3 (37.4 - 57.3) <.0001 | 63.1 (50.6 - 78.7) <.0001 | 86.0 (67.1 - 110.1) <.0001 | 28.1 (22.3 - 35.4) <.0001 | 35.2 (28.3 - 43.8) <.0001 | 44.1 (35.1 - 55.5) <.0001 | 55.3 (42.6 - 71.6) <.0001 |
| **73-82 mmol/mol (8.8-9.6%)** | 92.8 (74.5 - 115.7) <.0001 | 64.2 (50.9 - 80.8) <.0001 | 87.4 (70.2 - 108.9) <.0001 | 119.1 (94.8 - 149.7) <.0001 | 162.3 (125.7 - 209.5) <.0001 | 49.1 (38.8 - 62.1) <.0001 | 61.5 (49.0 - 77.1) <.0001 | 77.0 (60.7 - 97.7) <.0001 | 96.5 (73.8 - 126.1) <.0001 |
| **>=83 mmol/mol (>=9.7%)** | 232.4 (185.2 - 291.6) <.0001 | 161.5 (127.5 - 204.4) <.0001 | 220.0 (175.8 - 275.4) <.0001 | 299.8 (237.4 - 378.5) <.0001 | 408.5 (315.1 - 529.6) <.0001 | 116.9 (91.8 - 148.9) <.0001 | 146.5 (116.0 - 185.0) <.0001 | 183.5 (143.6 - 234.5) <.0001 | 229.9 (174.6 - 302.6) <.0001 |
|  |  |  |  |  |  |  |  |  |  |
| **Controls (reference)** | 1.00 | 1.00 | 1.00 | 1.00 | 1.00 | 1.00 | 1.00 | 1.00 | 1.00 |
| **Normoalbuminuria** | 27.0 (21.8 - 33.4) <.0001 | 23.1 (18.5 - 29.0) <.0001 | 27.0 (21.8 - 33.5) <.0001 | 31.5 (25.1 - 39.6) <.0001 | 36.7 (28.2 - 47.8) <.0001 | 20.6 (16.4 - 25.9) <.0001 | 23.1 (18.5 - 28.7) <.0001 | 25.8 (20.4 - 32.7) <.0001 | 28.9 (22.0 - 37.9) <.0001 |
| **Microalbuminuria** | 72.5 (57.8 - 91.0) <.0001 | 59.8 (46.8 - 76.5) <.0001 | 69.8 (55.5 - 87.8) <.0001 | 81.4 (64.3 - 103.1) <.0001 | 95.0 (72.9 - 123.8) <.0001 | 48.0 (37.4 - 61.7) <.0001 | 53.7 (42.4 - 68.0) <.0001 | 60.1 (47.0 - 76.8) <.0001 | 67.2 (51.0 - 88.6) <.0001 |
| **Macroalbuminuria** | 148.5 (118.7 - 185.7) <.0001 | 122.7 (96.4 - 156.2) <.0001 | 143.2 (114.3 - 179.3) <.0001 | 167.0 (132.3 - 210.7) <.0001 | 194.8 (149.9 - 253.1) <.0001 | 89.2 (69.5 - 114.5) <.0001 | 99.8 (78.9 - 126.3) <.0001 | 111.6 (87.4 - 142.6) <.0001 | 124.9 (94.8 - 164.5) <.0001 |
| **CKD stage 5** | 505.1 (397.6 - 641.6) <.0001 | 411.4 (318.0 - 532.3) <.0001 | 479.9 (377.4 - 610.3) <.0001 | 559.9 (438.0 - 715.6) <.0001 | 653.0 (497.7 - 856.9) <.0001 | 273.7 (209.6 - 357.3) <.0001 | 306.1 (237.7 - 394.2) <.0001 | 342.4 (263.7 - 444.5) <.0001 | 383.0 (286.7 - 511.7) <.0001 |
|  |  |  |  |  |  |  |  |  |  |
| **Controls (reference)** | 1.00 | 1.00 | 1.00 | 1.00 | 1.00 | 1.00 | 1.00 | 1.00 | 1.00 |
| **CKD stage 1 (eGFR >=90)** | 27.3 (21.4 - 34.8) <.0001 | 24.2 (18.8 - 31.0) <.0001 | 27.9 (21.9 - 35.5) <.0001 | 32.2 (24.9 - 41.7) <.0001 | 37.3 (27.8 - 49.9) <.0001 | 21.6 (16.8 - 27.7) <.0001 | 24.1 (18.8 - 30.8) <.0001 | 26.8 (20.6 - 34.9) <.0001 | 29.9 (22.2 - 40.4) <.0001 |
| **CKD stage 2 (eGFR 60-89)** | 37.6 (30.3 - 46.7) <.0001 | 32.3 (25.7 - 40.7) <.0001 | 37.4 (30.1 - 46.4) <.0001 | 43.2 (34.3 - 54.4) <.0001 | 49.9 (38.3 - 65.0) <.0001 | 29.9 (22.2 - 40.4) <.0001 | 31.3 (25.0 - 39.1) <.0001 | 34.9 (27.5 - 44.2) <.0001 | 38.9 (29.6 - 51.2) <.0001 |
| **CKD stage 3 (eGFR 30-59)** | 87.2 (69.3 - 109.8) <.0001 | 72.0 (56.0 - 92.7) <.0001 | 83.2 (65.9 - 105.1) <.0001 | 96.2 (75.7 - 122.1) <.0001 | 111.1 (85.1 - 145.1) <.0001 | 53.5 (41.3 - 69.4) <.0001 | 59.7 (46.8 - 76.2) <.0001 | 66.6 (51.9 - 85.6) <.0001 | 74.3 (56.2 - 98.2) <.0001 |
| **CKD stage 4 (eGFR 15-29)** | 152.3 (109.5 - 211.7) <.0001 | 126.3 (89.5 - 178.1) <.0001 | 145.9 (104.8 - 203.2) <.0001 | 168.6 (120.6 - 235.8) <.0001 | 194.8 (136.5 - 278.1) <.0001 | 84.5 (59.4 - 120.1) <.0001 | 94.3 (67.0 - 132.6) <.0001 | 105.1 (74.3 - 148.8) <.0001 | 117.3 (81.0 - 169.7) <.0001 |
| **CKD stage 5 (eGFR <15, dialysis or transplantation)** | 496.3 (390.6 - 630.5) <.0001 | 411.9 (318.4 - 532.7) <.0001 | 475.9 (374.3 - 605.1) <.0001 | 549.9 (429.9 - 703.4) <.0001 | 635.4 (483.1 - 835.6) <.0001 | 267.9 (204.9 - 350.1) <.0001 | 298.8 (231.8 - 385.1) <.0001 | 333.3 (256.3 - 433.2) <.0001 | 371.7 (277.6 - 497.7) <.0001 |
| Model 1: Adjusted for time-updated age and sex. Model 2: Adjusted for time-updated age, sex and time-updated diabetes duration centered at 30, 40, 50 and 60 years. Model 3: Adjusted for time-updated age, sex, born in Sweden, maximum education level, baseline comorbidities and time-updated diabetes duration centered at 30, 40, 50 and 60 years. | | | | | | | | | |

# *10 Supplement Table 6. All models Adjusted hazard ratios for all Amputation and 95% confidence intervals for time-updated mean HbA1c categories and Normoalbuminuria versus the reference group examined by Cox regression*

|  | **Hazard ratio (95% CI)** **p-value** | | | | | | | | |
| --- | --- | --- | --- | --- | --- | --- | --- | --- | --- |
|  | **Model 1** | **Model 2** | | | | **Model 3** | | | |
| **Amputation** | **All** | **Diabetes duration 30 years** | **Diabetes duration 40 years** | **Diabetes duration 50 years** | **Diabetes duration 60 years** | **Diabetes duration 30 years** | **Diabetes duration 40 years** | **Diabetes duration 50 years** | **Diabetes duration 60 years** |
| **Time updated mean HbA1c categories and Albuminuria** | | | | | | | | | |
| **Controls (reference)** | 1.00 | 1.00 | 1.00 | 1.00 | 1.00 | 1.00 | 1.00 | 1.00 | 1.00 |
| **<=52 mmol/mol (<=6.9%) – Normoalbuminuria** | 9.3 (5.7 - 15.1) <.0001 | 7.1 (4.3 - 11.6) <.0001 | 9.0 (5.6 - 14.7) <.0001 | 11.5 (7.1 - 18.8) <.0001 | 14.7 (8.9 - 24.4) <.0001 | 6.2 (3.7 - 10.4) <.0001 | 7.5 (4.5 - 12.4) <.0001 | 9.0 (5.3 - 15.0) <.0001 | 10.8 (6.3 - 18.3) <.0001 |
| **53-62 mmol/mol (7.0-7.8%) – Normoalbuminuria** | 19.0 (14.2 - 25.5) <.0001 | 14.3 (10.6 - 19.4) <.0001 | 18.3 (13.7 - 24.5) <.0001 | 23.4 (17.3 - 31.5) <.0001 | 29.8 (21.6 - 41.3) <.0001 | 13.0 (9.6 - 17.7) <.0001 | 15.7 (11.7 - 21.1) <.0001 | 18.8 (13.9 - 25.5) <.0001 | 22.6 (16.2 - 31.5) <.0001 |
| **63-72 mmol/mol (7.9-8.7%) – Normoalbuminuria** | 28.7 (22.0 - 37.5) <.0001 | 22.0 (16.6 - 29.0) <.0001 | 28.1 (21.5 - 36.7) <.0001 | 35.9 (27.2 - 47.3) <.0001 | 45.8 (33.7 - 62.2) <.0001 | 19.7 (14.9 - 26.1) <.0001 | 23.7 (18.0 - 31.1) <.0001 | 28.4 (21.4 - 37.7) <.0001 | 34.1 (24.9 - 46.7) <.0001 |
| **73-82 mmol/mol (8.8-9.6%) – Normoalbuminuria** | 40.2 (28.8 - 56.2) <.0001 | 31.3 (22.2 - 44.0) <.0001 | 39.9 (28.6 - 55.8) <.0001 | 51.0 (36.2 - 71.9) <.0001 | 65.2 (45.2 - 94.1) <.0001 | 26.4 (18.7 - 37.3) <.0001 | 31.8 (22.7 - 44.5) <.0001 | 38.1 (26.9 - 54.0) <.0001 | 45.8 (31.5 - 66.5) <.0001 |
| **>=83 mmol/mol (>=9.7%) – Normoalbuminuria** | 160.7 (116.1 - 222.3) <.0001 | 129.3 (93.2 - 179.5) <.0001 | 165.4 (119.8 - 228.2) <.0001 | 211.1 (151.2 - 294.8) <.0001 | 269.7 (188.0 - 386.9) <.0001 | 106.7 (76.5 - 148.8) <.0001 | 128.1 (92.3 - 178.0) <.0001 | 153.9 (109.4 - 216.5) <.0001 | 184.8 (127.6 - 267.5) <.0001 |
| **<=52 mmol/mol (<=6.9%) - Not Normoalbuminuria** | 58.2 (39.1 - 86.5) <.0001 | 40.0 (26.4 - 60.5) <.0001 | 51.1 (34.2 - 76.3) <.0001 | 65.3 (43.7 - 97.5) <.0001 | 83.4 (55.1 - 126.3) <.0001 | 32.6 (21.5 - 49.4) <.0001 | 39.2 (26.1 - 58.7) <.0001 | 47.0 (31.3 - 70.6) <.0001 | 56.5 (37.0 - 86.2) <.0001 |
| **53-62 mmol/mol (7.0-7.8%)- Not Normoalbuminuria** | 71.5 (54.7 - 93.4) <.0001 | 49.5 (37.0 - 66.1) <.0001 | 63.2 (48.2 - 82.9) <.0001 | 80.8 (61.4 - 106.1) <.0001 | 103.1 (76.9 - 138.4) <.0001 | 38.7 (28.8 - 52.0) <.0001 | 46.5 (35.2 - 61.5) <.0001 | 55.8 (42.1 - 74.1) <.0001 | 67.0 (49.4 - 91.1) <.0001 |
| **63-72 mmol/mol (7.9-8.7%) - Not Normoalbuminuria** | 106.6 (84.2 - 134.9) <.0001 | 77.4 (60.0 - 99.8) <.0001 | 98.9 (78.0 - 125.5) <.0001 | 126.4 (99.0 - 161.3) <.0001 | 161.4 (123.1 - 211.8) <.0001 | 60.2 (46.5 - 78.1) <.0001 | 72.3 (56.6 - 92.4) <.0001 | 86.8 (67.4 - 111.9) <.0001 | 104.3 (78.6 - 138.4) <.0001 |
| **73-82 mmol/mol (8.8-9.6% ) - Not Normoalbuminuria** | 173.7 (136.6 - 220.9) <.0001 | 129.0 (99.9 - 166.5) <.0001 | 164.8 (129.5 - 209.7) <.0001 | 210.6 (164.1 - 270.2) <.0001 | 268.9 (203.7 - 355.1) <.0001 | 96.6 (74.4 - 125.4) <.0001 | 116.0 (90.4 - 148.8) <.0001 | 139.3 (107.4 - 180.7) <.0001 | 167.2 (125.0 - 223.7) <.0001 |
| **>=83 mmol/mol (>=9.7%) - Not Normoalbuminuria** | 385.0 (299.8 - 494.3) <.0001 | 292.3 (225.3 - 379.3) <.0001 | 373.5 (291.4 - 478.8) <.0001 | 477.3 (368.7 - 617.8) <.0001 | 609.6 (457.2 - 812.6) <.0001 | 207.3 (158.5 - 271.2) <.0001 | 249.0 (192.3 - 322.4) <.0001 | 299.0 (228.3 - 391.6) <.0001 | 359.0 (265.8 - 485.0) <.0001 |
| Model 1: Adjusted for time-updated age and sex. Model 2: Adjusted for time-updated age, sex and time-updated diabetes duration centered at 30, 40, 50 and 60 years. Model 3: Adjusted for time-updated age, sex, born in Sweden, maximum education level, baseline comorbidities and time-updated diabetes duration centered at 30, 40, 50 and 60 years. | | | | | | | | | |

# *Supplement Table 7*. *All models Adjusted hazard ratio of all amputations for persons with type 1DM versus controls and 95% confidence intervals for time-updated mean HbA1c categories and coexisting normoalbuminuria and eGFR>60 ml/min.*

|  | **Hazard ratio (95% CI)** **p-value** | | | | | | | | |
| --- | --- | --- | --- | --- | --- | --- | --- | --- | --- |
|  | **Model 1** | **Model 2** | | | | **Model 3** | | | |
| **Amputation** | **All** | **Diabetes duration 30 years** | **Diabetes duration 40 years** | **Diabetes duration 50 years** | **Diabetes duration 60 years** | **Diabetes duration 30 years** | **Diabetes duration 40 years** | **Diabetes duration 50 years** | **Diabetes duration 60 years** |
| **Time updated mean HbA1c categories and eGFR** |  |  |  |  |  |  |  |  |  |
| **Controls (reference)** | 1.00 | 1.00 | 1.00 | 1.00 | 1.00 | 1.00 | 1.00 | 1.00 | 1.00 |
| **<=52 mmol/mol (<=6.9%) - eGFR>=60** | 11.1 (7.1 - 17.2) <.0001 | 8.9 (5.7 - 13.8) <.0001 | 11.0 (7.1 - 17.0) <.0001 | 13.6 (8.7 - 21.2) <.0001 | 16.8 (10.6 - 26.7) <.0001 | 7.8 (4.9 - 12.4) <.0001 | 9.1 (5.8 - 14.5) <.0001 | 10.8 (6.8 - 17.1) <.0001 | 12.7 (7.8 - 20.6) <.0001 |
| **53-62 mmol/mol (7.0-7.8%) - eGFR>=60** | 19.4 (14.7 - 25.6) <.0001 | 15.3 (11.4 - 20.4) <.0001 | 18.9 (14.3 - 25.0) <.0001 | 23.4 (17.5 - 31.2) <.0001 | 29.0 (21.1 - 39.7) <.0001 | 13.5 (10.1 - 18.1) <.0001 | 15.9 (12.0 - 21.1) <.0001 | 18.7 (13.9 - 25.1) <.0001 | 22.0 (15.9 - 30.4) <.0001 |
| **63-72 mmol/mol (7.9-8.7%) - eGFR>=60** | 33.8 (26.4 - 43.2) <.0001 | 27.0 (20.9 - 34.9) <.0001 | 33.4 (26.1 - 42.7) <.0001 | 41.4 (32.0 - 53.5) <.0001 | 51.2 (38.4 - 68.4) <.0001 | 24.1 (18.6 - 31.2) <.0001 | 28.3 (22.1 - 36.3) <.0001 | 33.4 (25.7 - 43.3) <.0001 | 39.2 (29.2 - 52.7) <.0001 |
| **73-82 mmol/mol (8.8-9.6%) - eGFR>=60** | 53.5 (40.7 - 70.5) <.0001 | 43.4 (32.7 - 57.6) <.0001 | 53.7 (40.8 - 70.7) <.0001 | 66.5 (50.0 - 88.5) <.0001 | 82.4 (60.1 - 113.0) <.0001 | 36.4 (27.3 - 48.5) <.0001 | 42.8 (32.4 - 56.6) <.0001 | 50.4 (37.7 - 67.5) <.0001 | 59.3 (42.9 - 82.0) <.0001 |
| **>=83 mmol/mol (>=9.7%) - eGFR>=60** | 170.5 (128.5 - 226.3) <.0001 | 142.9 (107.4 - 190.2) <.0001 | 177.0 (133.7 - 234.2) <.0001 | 219.0 (163.1 - 294.2) <.0001 | 271.3 (195.7 - 376.2) <.0001 | 117.6 (87.9 - 157.3) <.0001 | 138.4 (104.0 - 184.3) <.0001 | 162.9 (120.5 - 220.3) <.0001 | 191.6 (137.1 - 267.8) <.0001 |
| **<=52 mmol/mol (<=6.9%) - eGFR<60** | 56.1 (36.6 - 86.0) <.0001 | 40.3 (25.9 - 62.9) <.0001 | 49.9 (32.4 - 76.8) <.0001 | 61.8 (40.1 - 95.1) <.0001 | 76.5 (49.1 - 119.4) <.0001 | 32.7 (20.9 - 51.1) <.0001 | 38.5 (24.9 - 59.5) <.0001 | 45.3 (29.3 - 70.1) <.0001 | 53.3 (33.9 - 83.7) <.0001 |
| **53-62 mmol/mol (7.0-7.8%) - eGFR<60** | 78.0 (58.6 - 103.8) <.0001 | 56.8 (41.7 - 77.3) <.0001 | 70.3 (52.6 - 94.0) <.0001 | 87.0 (65.0 - 116.5) <.0001 | 107.8 (78.9 - 147.3) <.0001 | 43.4 (31.8 - 59.4) <.0001 | 51.1 (38.0 - 68.8) <.0001 | 60.2 (44.6 - 81.3) <.0001 | 70.8 (51.3 - 97.7) <.0001 |
| **63-72 mmol/mol (7.9-8.7%) - eGFR<60** | 123.6 (95.8 - 159.6) <.0001 | 92.5 (70.2 - 121.9) <.0001 | 114.6 (88.5 - 148.5) <.0001 | 141.8 (109.0 - 184.6) <.0001 | 175.7 (131.7 - 234.4) <.0001 | 67.2 (50.6 - 89.2) <.0001 | 79.1 (60.5 - 103.4) <.0001 | 93.1 (70.7 - 122.5) <.0001 | 109.5 (81.0 - 148.0) <.0001 |
| **73-82 mmol/mol (8.8-9.6%) - eGFR<60** | 220.9 (169.4 - 288.1) <.0001 | 167.5 (126.3 - 222.2) <.0001 | 207.5 (158.8 - 271.1) <.0001 | 256.8 (195.4 - 337.4) <.0001 | 318.1 (236.0 - 428.7) <.0001 | 117.2 (87.5 - 157.0) <.0001 | 137.9 (104.4 - 182.3) <.0001 | 162.3 (122.0 - 216.0) <.0001 | 190.9 (139.8 - 260.9) <.0001 |
| **>=83 mmol/mol (>=9.7%) - eGFR<60** | 462.1 (350.2 - 609.8) <.0001 | 355.4 (265.6 - 475.6) <.0001 | 440.1 (333.4 - 581.0) <.0001 | 544.7 (409.9 - 723.8) <.0001 | 674.8 (495.1 - 919.7) <.0001 | 248.5 (184.1 - 335.5) <.0001 | 292.5 (219.3 - 390.1) <.0001 | 344.3 (256.2 - 462.9) <.0001 | 405.0 (293.4 - 559.1) <.0001 |
| Model 1: Adjusted for time-updated age and sex. Model 2: Adjusted for time-updated age, sex and time-updated diabetes duration centered at 30, 40, 50 and 60 years. Model 3: Adjusted for time-updated age, sex, born in Sweden, maximum education level, baseline comorbidities and time-updated diabetes duration centered at 30, 40, 50 and 60 years. | | | | | | | | | |

# *Supplement Table 8. All models - Hazard ratios for minor amputations and 95% confidence intervals for people with type 1DM versus controls, time-updated mean HbA1c categories, albuminuria categories and eGFR categories examined by Cox regression*

|  | **Hazard ratio (95% CI)** **p-value** | | | | | | | | |
| --- | --- | --- | --- | --- | --- | --- | --- | --- | --- |
|  | **Model 1** | **Model 2** | | | | **Model 3** | | | |
| **Amputation below ankle** | **All** | **Diabetes duration 30 years** | **Diabetes duration 40 years** | **Diabetes duration 50 years** | **Diabetes duration 60 years** | **Diabetes duration 30 years** | **Diabetes duration 40 years** | **Diabetes duration 50 years** | **Diabetes duration 60 years** |
| **Overall, n events=689, data used = 100.0%** |  |  |  |  |  |  |  |  |  |
| **Controls (reference)** | 1.00 | 1.00 | 1.00 | 1.00 | 1.00 | 1.00 | 1.00 | 1.00 | 1.00 |
| **Group All Type I diabetes with no prior amputation** | 112.3 (79.2 - 159.4) <.0001 | 90.3 (63.2 - 129.2) <.0001 | 114.2 (80.5 - 162.2) <.0001 | 144.3 (99.9 - 208.3) <.0001 | 182.4 (121.7 - 273.4) <.0001 | 75.7 (52.6 - 109.0) <.0001 | 86.3 (60.2 - 123.8) <.0001 | 98.4 (67.3 - 143.9) <.0001 | 112.3 (73.7 - 171.0) <.0001 |
| **Time updated mean HbA1c categories, n events=686, data used = 99.9%** |  |  |  |  |  |  |  |  |  |
| **Controls (reference)** | 1.00 | 1.00 | 1.00 | 1.00 | 1.00 | 1.00 | 1.00 | 1.00 | 1.00 |
| **<=52 mmol/mol (<=6.9%)** | 39.1 (24.3 - 62.9) <.0001 | 29.5 (18.2 - 47.9) <.0001 | 38.2 (23.7 - 61.5) <.0001 | 49.4 (30.4 - 80.4) <.0001 | 64.0 (38.4 - 106.8) <.0001 | 27.3 (16.7 - 44.7) <.0001 | 32.0 (19.7 - 52.0) <.0001 | 37.4 (22.8 - 61.5) <.0001 | 43.7 (25.9 - 74.0) <.0001 |
| **53-62 mmol/mol (7.0-7.8%)** | 67.7 (46.1 - 99.2) <.0001 | 50.4 (34.0 - 74.9) <.0001 | 65.3 (44.5 - 95.8) <.0001 | 84.5 (56.9 - 125.4) <.0001 | 109.3 (71.5 - 167.3) <.0001 | 45.0 (30.2 - 67.2) <.0001 | 52.7 (35.6 - 77.9) <.0001 | 61.6 (41.1 - 92.4) <.0001 | 72.0 (46.5 - 111.7) <.0001 |
| **63-72 mmol/mol (7.9-8.7%)** | 100.6 (69.5 - 145.8) <.0001 | 76.2 (52.0 - 111.5) <.0001 | 98.6 (68.0 - 142.8) <.0001 | 127.6 (87.0 - 187.1) <.0001 | 165.1 (108.9 - 250.3) <.0001 | 65.6 (44.6 - 96.7) <.0001 | 76.8 (52.5 - 112.2) <.0001 | 89.8 (60.5 - 133.2) <.0001 | 105.0 (68.3 - 161.5) <.0001 |
| **73-82 mmol/mol (8.8-9.6%)** | 197.5 (135.6 - 287.5) <.0001 | 150.9 (102.7 - 221.6) <.0001 | 195.3 (134.2 - 284.1) <.0001 | 252.7 (171.5 - 372.6) <.0001 | 327.1 (214.6 - 498.4) <.0001 | 123.4 (83.4 - 182.6) <.0001 | 144.4 (98.3 - 212.1) <.0001 | 168.9 (113.1 - 252.0) <.0001 | 197.5 (127.6 - 305.6) <.0001 |
| **>=83 mmol/mol (>=9.7%)** | 504.1 (344.4 - 738.0) <.0001 | 386.7 (262.4 - 569.9) <.0001 | 500.4 (342.6 - 730.9) <.0001 | 647.6 (437.7 - 958.3) <.0001 | 838.1 (548.0 - 1281.9) <.0001 | 299.7 (201.5 - 445.6) <.0001 | 350.5 (237.2 - 517.8) <.0001 | 409.9 (273.0 - 615.4) <.0001 | 479.4 (308.0 - 746.3) <.0001 |
| **Time updated albuminuria categories, n events=589, data used = 98.6%** |  |  |  |  |  |  |  |  |  |
| **Controls (reference)** | 1.00 | 1.00 | 1.00 | 1.00 | 1.00 | 1.00 | 1.00 | 1.00 | 1.00 |
| **Normoalbuminuria** | 57.7 (39.8 - 83.6) <.0001 | 53.3 (36.5 - 77.7) <.0001 | 58.9 (40.6 - 85.4) <.0001 | 65.3 (44.1 - 96.6) <.0001 | 72.2 (46.7 - 111.7) <.0001 | 48.6 (33.1 - 71.4) <.0001 | 50.4 (34.5 - 73.7) <.0001 | 52.4 (35.1 - 78.2) <.0001 | 54.3 (34.8 - 85.0) <.0001 |
| **Microalbuminuria** | 170.5 (116.5 - 249.5) <.0001 | 153.8 (103.7 - 228.1) <.0001 | 170.1 (116.1 - 249.1) <.0001 | 188.4 (126.8 - 280.0) <.0001 | 208.6 (135.2 - 321.9) <.0001 | 130.6 (87.5 - 195.1) <.0001 | 135.5 (91.7 - 200.2) <.0001 | 140.6 (93.6 - 211.2) <.0001 | 145.9 (93.3 - 228.1) <.0001 |
| **Macroalbuminuria** | 301.9 (206.2 - 442.2) <.0001 | 271.6 (183.0 - 403.2) <.0001 | 300.4 (205.0 - 440.1) <.0001 | 332.8 (224.1 - 494.3) <.0001 | 368.4 (239.0 - 567.9) <.0001 | 209.2 (139.4 - 314.1) <.0001 | 217.0 (146.2 - 322.0) <.0001 | 225.2 (149.5 - 339.4) <.0001 | 233.7 (149.2 - 366.2) <.0001 |
| **CKD stage 5** | 974.7 (655.5 - 1449.2) <.0001 | 868.5 (575.3 - 1311.0) <.0001 | 960.5 (645.8 - 1428.5) <.0001 | 1064.3 (707.9 - 1600.0) <.0001 | 1178.0 (757.2 - 1832.5) <.0001 | 623.7 (408.4 - 952.6) <.0001 | 646.8 (428.6 - 975.9) <.0001 | 671.5 (439.1 - 1026.8) <.0001 | 696.7 (439.2 - 1105.2) <.0001 |
| **Time updated eGFR categories, n events=571, data used = 99.0%** |  |  |  |  |  |  |  |  |  |
| **Controls (reference)** | 1.00 | 1.00 | 1.00 | 1.00 | 1.00 | 1.00 | 1.00 | 1.00 | 1.00 |
| **CKD stage 1 (eGFR >=90)** | 53.0 (35.6 - 78.8) <.0001 | 50.1 (33.5 - 74.8) <.0001 | 54.6 (36.7 - 81.3) <.0001 | 59.6 (39.1 - 90.8) <.0001 | 65.0 (40.8 - 103.6) <.0001 | 45.9 (30.6 - 69.0) <.0001 | 47.2 (31.5 - 70.7) <.0001 | 48.5 (31.6 - 74.5) <.0001 | 49.8 (31.0 - 80.2) <.0001 |
| **CKD stage 2 (eGFR 60-89)** | 89.6 (61.8 - 129.8) <.0001 | 83.7 (57.3 - 122.3) <.0001 | 91.3 (62.9 - 132.6) <.0001 | 99.6 (67.2 - 147.7) <.0001 | 108.6 (70.1 - 168.4) <.0001 | 75.3 (51.2 - 110.8) <.0001 | 77.3 (52.9 - 113.2) <.0001 | 79.5 (53.1 - 118.9) <.0001 | 81.7 (52.1 - 128.0) <.0001 |
| **CKD stage 3 (eGFR 30-59)** | 221.6 (150.6 - 326.2) <.0001 | 202.8 (135.8 - 302.9) <.0001 | 221.2 (150.0 - 326.2) <.0001 | 241.3 (161.4 - 360.8) <.0001 | 263.1 (169.4 - 408.7) <.0001 | 160.5 (106.4 - 242.1) <.0001 | 164.9 (110.6 - 245.9) <.0001 | 169.5 (111.9 - 256.7) <.0001 | 174.2 (110.6 - 274.5) <.0001 |
| **CKD stage 4 (eGFR 15-29)** | 287.0 (171.5 - 480.5) <.0001 | 262.8 (155.4 - 444.5) <.0001 | 286.7 (171.2 - 480.3) <.0001 | 312.8 (184.7 - 529.5) <.0001 | 341.1 (195.6 - 594.9) <.0001 | 190.8 (111.7 - 325.9) <.0001 | 196.0 (115.7 - 332.2) <.0001 | 201.5 (117.4 - 345.7) <.0001 | 207.2 (117.0 - 366.8) <.0001 |
| **CKD stage 5 (eGFR <15, dialysis or transplantation)** | 958.2 (644.4 - 1424.9) <.0001 | 874.6 (580.3 - 1318.3) <.0001 | 953.9 (641.2 - 1418.9) <.0001 | 1040.4 (690.5 - 1567.7) <.0001 | 1134.7 (726.0 - 1773.4) <.0001 | 623.1 (408.2 - 950.9) <.0001 | 640.1 (424.0 - 966.4) <.0001 | 658.0 (429.3 - 1008.5) <.0001 | 676.2 (424.5 - 1077.1) <.0001 |
| Model 1: Adjusted for time-updated age and sex. Model 2: Adjusted for time-updated age, sex and time-updated diabetes duration centered at 30, 40, 50 and 60 years. Model 3: Adjusted for time-updated age, sex, born in Sweden, maximum education level, baseline comorbidities and time-updated diabetes duration centered at 30, 40, 50 and 60 years. | | | | | | | | | |

# *Supplement Table 9. All models - Hazard ratios for major amputations and 95% confidence intervals for people with Type 1DM versus controls, time-updated mean HbA1c categories, albuminuria categories and eGFR categories examined by Cox regression*

|  | **Hazard ratio (95% CI)** **p-value** | | | | | | | | |
| --- | --- | --- | --- | --- | --- | --- | --- | --- | --- |
|  | **Model 1** | **Model 2** | | | | **Model 3** | | | |
| **Amputation above ankle** | **All** | **Diabetes duration 30 years** | **Diabetes duration 40 years** | **Diabetes duration 50 years** | **Diabetes duration 60 years** | **Diabetes duration 30 years** | **Diabetes duration 40 years** | **Diabetes duration 50 years** | **Diabetes duration 60 years** |
| **Overall, n events=725, data used = 100.0%** |  |  |  |  |  |  |  |  |  |
| **Controls (reference)** | 1.00 | 1.00 | 1.00 | 1.00 | 1.00 | 1.00 | 1.00 | 1.00 | 1.00 |
| **Group All Type I diabetes with no prior amputation** | 42.6 (34.0 - 53.2) <.0001 | 27.8 (21.7 - 35.6) <.0001 | 38.4 (30.6 - 48.1) <.0001 | 53.1 (41.9 - 67.2) <.0001 | 73.3 (55.8 - 96.3) <.0001 | 21.4 (16.6 - 27.5) <.0001 | 27.3 (21.5 - 34.5) <.0001 | 34.8 (27.1 - 44.7) <.0001 | 44.4 (33.2 - 59.4) <.0001 |
| **Time updated mean HbA1c categories, n events=716, data used = 99.9%** |  |  |  |  |  |  |  |  |  |
| **Controls (reference)** | 1.00 | 1.00 | 1.00 | 1.00 | 1.00 | 1.00 | 1.00 | 1.00 | 1.00 |
| **<=52 mmol/mol (<=6.9%)** | 15.6 (10.6 - 22.9) <.0001 | 9.0 (6.0 - 13.5) <.0001 | 13.0 (8.8 - 19.1) <.0001 | 18.6 (12.6 - 27.5) <.0001 | 26.7 (17.7 - 40.3) <.0001 | 8.1 (5.3 - 12.2) <.0001 | 10.8 (7.3 - 16.0) <.0001 | 14.4 (9.7 - 21.5) <.0001 | 19.3 (12.6 - 29.4) <.0001 |
| **53-62 mmol/mol (7.0-7.8%)** | 28.0 (21.4 - 36.6) <.0001 | 16.3 (12.1 - 21.9) <.0001 | 23.4 (17.8 - 30.7) <.0001 | 33.6 (25.5 - 44.3) <.0001 | 48.2 (35.6 - 65.4) <.0001 | 13.2 (9.8 - 17.8) <.0001 | 17.6 (13.3 - 23.3) <.0001 | 23.5 (17.7 - 31.4) <.0001 | 31.5 (22.8 - 43.3) <.0001 |
| **63-72 mmol/mol (7.9-8.7%)** | 39.3 (30.5 - 50.8) <.0001 | 23.6 (17.9 - 31.2) <.0001 | 33.9 (26.2 - 43.8) <.0001 | 48.6 (37.4 - 63.2) <.0001 | 69.8 (52.0 - 93.8) <.0001 | 18.6 (14.0 - 24.8) <.0001 | 24.9 (19.1 - 32.5) <.0001 | 33.3 (25.3 - 43.8) <.0001 | 44.5 (32.6 - 60.7) <.0001 |
| **73-82 mmol/mol (8.8-9.6%)** | 69.8 (53.3 - 91.3) <.0001 | 42.8 (32.1 - 57.2) <.0001 | 61.5 (46.9 - 80.4) <.0001 | 88.2 (66.9 - 116.3) <.0001 | 126.6 (93.0 - 172.5) <.0001 | 30.6 (22.8 - 41.1) <.0001 | 40.9 (30.9 - 54.0) <.0001 | 54.6 (40.9 - 73.0) <.0001 | 73.0 (52.7 - 101.2) <.0001 |
| **>=83 mmol/mol (>=9.7%)** | 190.1 (144.3 - 250.5) <.0001 | 117.0 (87.3 - 156.8) <.0001 | 167.9 (127.8 - 220.6) <.0001 | 241.0 (182.1 - 318.8) <.0001 | 346.0 (253.4 - 472.5) <.0001 | 78.4 (58.1 - 105.9) <.0001 | 104.8 (78.8 - 139.4) <.0001 | 140.0 (104.0 - 188.5) <.0001 | 187.1 (134.1 - 261.1) <.0001 |
| **Time updated albuminuria categories, n events=608, data used = 98.6%** |  |  |  |  |  |  |  |  |  |
| **Controls (reference)** | 1.00 | 1.00 | 1.00 | 1.00 | 1.00 | 1.00 | 1.00 | 1.00 | 1.00 |
| **Normoalbuminuria** | 20.6 (15.9 - 26.7) <.0001 | 15.7 (11.8 - 20.8) <.0001 | 19.6 (15.1 - 25.4) <.0001 | 24.4 (18.6 - 32.0) <.0001 | 30.5 (22.3 - 41.6) <.0001 | 13.6 (10.2 - 18.1) <.0001 | 16.5 (12.6 - 21.6) <.0001 | 20.1 (15.2 - 26.6) <.0001 | 24.4 (17.6 - 33.7) <.0001 |
| **Microalbuminuria** | 48.1 (36.2 - 63.8) <.0001 | 34.7 (25.3 - 47.6) <.0001 | 43.3 (32.4 - 57.8) <.0001 | 54.0 (40.4 - 72.2) <.0001 | 67.4 (48.8 - 93.1) <.0001 | 26.2 (19.0 - 36.2) <.0001 | 31.8 (23.6 - 42.9) <.0001 | 38.7 (28.5 - 52.4) <.0001 | 47.0 (33.5 - 65.9) <.0001 |
| **Macroalbuminuria** | 118.5 (90.6 - 155.1) <.0001 | 86.1 (63.8 - 116.4) <.0001 | 107.5 (81.8 - 141.2) <.0001 | 134.0 (101.7 - 176.7) <.0001 | 167.3 (122.6 - 228.3) <.0001 | 59.3 (43.4 - 80.9) <.0001 | 72.0 (54.1 - 95.9) <.0001 | 87.6 (65.3 - 117.4) <.0001 | 106.4 (76.5 - 148.0) <.0001 |
| **CKD stage 5** | 427.5 (321.4 - 568.5) <.0001 | 305.7 (222.7 - 419.6) <.0001 | 381.4 (285.9 - 508.8) <.0001 | 475.6 (356.0 - 635.3) <.0001 | 593.8 (430.9 - 818.4) <.0001 | 194.1 (139.8 - 269.5) <.0001 | 235.9 (173.9 - 320.0) <.0001 | 286.7 (210.1 - 391.4) <.0001 | 348.5 (246.7 - 492.3) <.0001 |
| **Time updated eGFR categories, n events=580, data used = 99.0%** |  |  |  |  |  |  |  |  |  |
| **Controls (reference)** | 1.00 | 1.00 | 1.00 | 1.00 | 1.00 | 1.00 | 1.00 | 1.00 | 1.00 |
| **CKD stage 1 (eGFR >=90)** | 22.8 (16.8 - 30.8) <.0001 | 17.8 (13.0 - 24.4) <.0001 | 22.2 (16.5 - 30.0) <.0001 | 27.8 (20.3 - 38.0) <.0001 | 34.8 (24.4 - 49.6) <.0001 | 15.4 (11.2 - 21.2) <.0001 | 19.0 (14.0 - 25.7) <.0001 | 23.3 (16.9 - 32.1) <.0001 | 28.6 (19.9 - 41.1) <.0001 |
| **CKD stage 2 (eGFR 60-89)** | 26.9 (20.6 - 35.0) <.0001 | 20.0 (14.9 - 26.9) <.0001 | 25.1 (19.2 - 32.8) <.0001 | 31.3 (23.8 - 41.3) <.0001 | 39.2 (28.6 - 53.8) <.0001 | 16.7 (12.4 - 22.6) <.0001 | 20.6 (15.6 - 27.1) <.0001 | 25.2 (19.0 - 33.6) <.0001 | 31.0 (22.4 - 43.0) <.0001 |
| **CKD stage 3 (eGFR 30-59)** | 55.0 (41.5 - 72.9) <.0001 | 38.4 (27.8 - 53.2) <.0001 | 48.1 (35.9 - 64.4) <.0001 | 60.1 (45.0 - 80.4) <.0001 | 75.2 (54.6 - 103.5) <.0001 | 26.7 (19.1 - 37.3) <.0001 | 32.8 (24.1 - 44.5) <.0001 | 40.2 (29.6 - 54.7) <.0001 | 49.5 (35.3 - 69.3) <.0001 |
| **CKD stage 4 (eGFR 15-29)** | 122.0 (81.7 - 182.3) <.0001 | 86.1 (56.1 - 132.3) <.0001 | 107.7 (71.8 - 161.7) <.0001 | 134.7 (89.7 - 202.1) <.0001 | 168.5 (109.8 - 258.7) <.0001 | 55.0 (35.5 - 85.4) <.0001 | 67.6 (44.5 - 102.8) <.0001 | 83.1 (54.5 - 126.6) <.0001 | 102.1 (65.3 - 159.6) <.0001 |
| **CKD stage 5 (eGFR <15, dialysis or transplantation)** | 421.5 (316.9 - 560.6) <.0001 | 300.3 (218.4 - 412.9) <.0001 | 375.6 (281.5 - 501.1) <.0001 | 469.5 (351.4 - 627.2) <.0001 | 587.5 (425.8 - 810.6) <.0001 | 185.3 (132.9 - 258.5) <.0001 | 227.7 (167.5 - 309.6) <.0001 | 279.6 (204.6 - 382.2) <.0001 | 343.7 (242.9 - 486.3) <.0001 |
| Model 1: Adjusted for time-updated age and sex. Model 2: Adjusted for time-updated age, sex and time-updated diabetes duration centered at 30, 40, 50 and 60 years. Model 3: Adjusted for time-updated age, sex, born in Sweden, maximum education level, baseline comorbidities and time-updated diabetes duration centered at 30, 40, 50 and 60 years. | | | | | | | | | |

# *Supplement Table 10. Adjusted hazard ratios for minor amputation and 95% confidence intervals for time-updated mean HbA1c categories and Normoalbuminuria versus controls examined by Cox regression*

|  | **Hazard ratio (95% CI)** **p-value** | | | | | | | | |
| --- | --- | --- | --- | --- | --- | --- | --- | --- | --- |
|  | **Model 1** | **Model 2** | | | | **Model 3** | | | |
| **Amputation below ankle** | **All** | **Diabetes duration 30 years** | **Diabetes duration 40 years** | **Diabetes duration 50 years** | **Diabetes duration 60 years** | **Diabetes duration 30 years** | **Diabetes duration 40 years** | **Diabetes duration 50 years** | **Diabetes duration 60 years** |
| **Time updated mean HbA1c categories and Albuminuria** |  |  |  |  |  |  |  |  |  |
|  | 1.00 | 1.00 | 1.00 | 1.00 | 1.00 | 1.00 | 1.00 | 1.00 | 1.00 |
| **<=52 mmol/mol (<=6.9%) – Normoalbuminuria** | 15.4 (7.4 - 32.1) <.0001 | 13.0 (6.2 - 27.3) <.0001 | 15.6 (7.5 - 32.7) <.0001 | 18.9 (8.9 - 39.8) <.0001 | 22.7 (10.5 - 49.0) <.0001 | 11.3 (5.2 - 24.6) <.0001 | 12.5 (5.8 - 27.2) <.0001 | 13.9 (6.3 - 30.5) <.0001 | 15.4 (6.8 - 34.6) <.0001 |
| **53-62 mmol/mol (7.0-7.8%) – Normoalbuminuria** | 45.4 (29.3 - 70.3) <.0001 | 37.8 (24.2 - 59.1) <.0001 | 45.6 (29.4 - 70.6) <.0001 | 54.9 (35.0 - 86.2) <.0001 | 66.2 (40.7 - 107.6) <.0001 | 34.9 (22.2 - 54.9) <.0001 | 38.7 (24.8 - 60.4) <.0001 | 43.0 (27.1 - 68.1) <.0001 | 47.6 (29.0 - 78.3) <.0001 |
| **63-72 mmol/mol (7.9-8.7%) – Normoalbuminuria** | 63.6 (41.8 - 96.8) <.0001 | 53.5 (34.9 - 82.2) <.0001 | 64.5 (42.4 - 98.2) <.0001 | 77.8 (50.3 - 120.3) <.0001 | 93.8 (58.4 - 150.5) <.0001 | 49.6 (32.2 - 76.5) <.0001 | 55.0 (35.9 - 84.2) <.0001 | 61.0 (39.2 - 95.1) <.0001 | 67.7 (41.7 - 109.7) <.0001 |
| **73-82 mmol/mol (8.8-9.6%) – Normoalbuminuria** | 82.2 (50.1 - 135.0) <.0001 | 69.8 (42.3 - 115.2) <.0001 | 84.1 (51.3 - 138.1) <.0001 | 101.4 (60.9 - 168.8) <.0001 | 122.3 (71.1 - 210.3) <.0001 | 61.8 (37.2 - 102.6) <.0001 | 68.5 (41.5 - 113.1) <.0001 | 76.0 (45.3 - 127.5) <.0001 | 84.3 (48.6 - 146.3) <.0001 |
| **>=83 mmol/mol (>=9.7%) – Normoalbuminuria** | 290.3 (177.0 - 476.2) <.0001 | 251.3 (152.9 - 413.2) <.0001 | 303.0 (185.0 - 496.2) <.0001 | 365.3 (219.4 - 608.0) <.0001 | 440.3 (255.5 - 759.1) <.0001 | 221.8 (134.0 - 367.0) <.0001 | 245.8 (149.0 - 405.3) <.0001 | 272.8 (162.5 - 457.8) <.0001 | 302.4 (173.8 - 526.3) <.0001 |
| **<=52 mmol/mol (<=6.9%) - Not Normoalbuminuria** | 130.5 (74.1 - 229.8) <.0001 | 102.3 (57.2 - 183.0) <.0001 | 123.4 (69.9 - 217.8) <.0001 | 148.8 (83.9 - 263.9) <.0001 | 179.3 (98.9 - 325.2) <.0001 | 87.9 (48.9 - 157.9) <.0001 | 97.4 (54.8 - 173.0) <.0001 | 108.1 (60.4 - 193.4) <.0001 | 119.9 (65.4 - 219.7) <.0001 |
| **53-62 mmol/mol (7.0-7.8%)- Not Normoalbuminuria** | 139.4 (90.5 - 214.6) <.0001 | 109.4 (69.7 - 171.7) <.0001 | 131.9 (85.4 - 203.7) <.0001 | 159.0 (102.3 - 247.2) <.0001 | 191.7 (119.8 - 306.7) <.0001 | 91.7 (58.0 - 144.9) <.0001 | 101.6 (65.2 - 158.2) <.0001 | 112.7 (71.7 - 177.2) <.0001 | 125.0 (77.1 - 202.7) <.0001 |
| **63-72 mmol/mol (7.9-8.7%) - Not Normoalbuminuria** | 209.3 (141.0 - 310.7) <.0001 | 169.3 (112.3 - 255.2) <.0001 | 204.1 (137.3 - 303.5) <.0001 | 246.1 (163.7 - 370.0) <.0001 | 296.7 (190.6 - 461.9) <.0001 | 139.2 (91.5 - 211.5) <.0001 | 154.2 (102.7 - 231.5) <.0001 | 171.1 (112.5 - 260.4) <.0001 | 189.8 (120.2 - 299.5) <.0001 |
| **73-82 mmol/mol (8.8-9.6% ) - Not Normoalbuminuria** | 379.6 (256.2 - 562.3) <.0001 | 310.9 (207.2 - 466.4) <.0001 | 374.8 (252.9 - 555.4) <.0001 | 451.8 (300.9 - 678.4) <.0001 | 544.7 (349.8 - 848.0) <.0001 | 252.0 (166.4 - 381.5) <.0001 | 279.2 (186.4 - 418.2) <.0001 | 309.9 (203.8 - 471.4) <.0001 | 343.6 (217.4 - 543.1) <.0001 |
| **>=83 mmol/mol (>=9.7%) - Not Normoalbuminuria** | 862.2 (578.2 - 1285.8) <.0001 | 715.3 (475.3 - 1076.6) <.0001 | 862.4 (579.1 - 1284.2) <.0001 | 1039.7 (688.1 - 1570.8) <.0001 | 1253.4 (799.3 - 1965.4) <.0001 | 547.9 (359.9 - 834.1) <.0001 | 607.1 (402.6 - 915.6) <.0001 | 673.8 (439.6 - 1032.8) <.0001 | 747.1 (468.9 - 1190.4) <.0001 |
| Model 1: Adjusted for time-updated age and sex. Model 2: Adjusted for time-updated age, sex and time-updated diabetes duration centered at 30, 40, 50 and 60 years. Model 3: Adjusted for time-updated age, sex, born in Sweden, maximum education level, baseline comorbidities and time-updated diabetes duration centered at 30, 40, 50 and 60 years. | | | | | | | | | |

# *Supplement Table 11. Adjusted hazard ratios for Minor amputation and 95% confidence intervals for time-updated mean HbA1c categories and eGFR<60/>=60 categories versus controls examined by Cox regression*

|  | **Hazard ratio (95% CI)** **p-value** | | | | | | | | |
| --- | --- | --- | --- | --- | --- | --- | --- | --- | --- |
|  | **Model 1** | **Model 2** | | | | **Model 3** | | | |
| **Amputation below ankle** | **All** | **Diabetes duration 30 years** | **Diabetes duration 40 years** | **Diabetes duration 50 years** | **Diabetes duration 60 years** | **Diabetes duration 30 years** | **Diabetes duration 40 years** | **Diabetes duration 50 years** | **Diabetes duration 60 years** |
| **Time updated mean HbA1c categories and eGFR, n events=570, data used = 98.9%** |  |  |  |  |  |  |  |  |  |
| **Controls (reference)** | 1.00 | 1.00 | 1.00 | 1.00 | 1.00 | 1.00 | 1.00 | 1.00 | 1.00 |
| **<=52 mmol/mol (<=6.9%) - eGFR>=60** | 19.0 (9.8 - 36.8) <.0001 | 16.7 (8.6 - 32.6) <.0001 | 19.5 (10.1 - 37.9) <.0001 | 22.8 (11.7 - 44.7) <.0001 | 26.6 (13.2 - 53.6) <.0001 | 14.7 (7.4 - 29.4) <.0001 | 16.0 (8.0 - 31.8) <.0001 | 17.3 (8.6 - 34.9) <.0001 | 18.8 (9.1 - 38.9) <.0001 |
| **53-62 mmol/mol (7.0-7.8%) - eGFR>=60** | 43.5 (28.3 - 66.9) <.0001 | 37.7 (24.3 - 58.4) <.0001 | 44.0 (28.6 - 67.6) <.0001 | 51.3 (32.9 - 80.1) <.0001 | 59.9 (37.0 - 97.0) <.0001 | 34.7 (22.2 - 54.1) <.0001 | 37.6 (24.3 - 58.3) <.0001 | 40.9 (26.0 - 64.3) <.0001 | 44.4 (27.2 - 72.5) <.0001 |
| **63-72 mmol/mol (7.9-8.7%) - eGFR>=60** | 69.3 (46.4 - 103.5) <.0001 | 60.4 (40.1 - 91.1) <.0001 | 70.5 (47.2 - 105.4) <.0001 | 82.3 (54.1 - 125.2) <.0001 | 96.1 (60.7 - 152.1) <.0001 | 55.7 (36.7 - 84.4) <.0001 | 60.5 (40.2 - 90.9) <.0001 | 65.6 (42.8 - 100.5) <.0001 | 71.2 (44.6 - 113.8) <.0001 |
| **73-82 mmol/mol (8.8-9.6%) - eGFR>=60** | 125.2 (82.2 - 190.6) <.0001 | 110.0 (71.8 - 168.5) <.0001 | 128.3 (84.3 - 195.3) <.0001 | 149.8 (96.7 - 232.0) <.0001 | 174.8 (108.5 - 281.7) <.0001 | 98.1 (63.6 - 151.3) <.0001 | 106.5 (69.5 - 163.2) <.0001 | 115.6 (74.0 - 180.5) <.0001 | 125.5 (77.2 - 204.1) <.0001 |
| **>=83 mmol/mol (>=9.7%) - eGFR>=60** | 377.1 (245.5 - 579.2) <.0001 | 337.1 (218.9 - 519.1) <.0001 | 393.4 (256.4 - 603.6) <.0001 | 459.2 (293.4 - 718.7) <.0001 | 536.0 (328.8 - 873.8) <.0001 | 297.7 (191.8 - 462.2) <.0001 | 323.2 (209.0 - 499.8) <.0001 | 350.8 (222.3 - 553.6) <.0001 | 380.9 (231.5 - 626.6) <.0001 |
| **<=52 mmol/mol (<=6.9%) - eGFR<60** | 128.5 (69.6 - 237.4) <.0001 | 105.1 (56.0 - 197.1) <.0001 | 122.7 (66.2 - 227.2) <.0001 | 143.2 (77.0 - 266.4) <.0001 | 167.1 (88.0 - 317.4) <.0001 | 91.1 (48.4 - 171.6) <.0001 | 98.9 (53.1 - 184.2) <.0001 | 107.4 (57.3 - 201.1) <.0001 | 116.6 (60.8 - 223.4) <.0001 |
| **53-62 mmol/mol (7.0-7.8%) - eGFR<60** | 175.5 (112.2 - 274.5) <.0001 | 144.6 (90.7 - 230.5) <.0001 | 168.8 (107.6 - 264.9) <.0001 | 197.0 (124.6 - 311.4) <.0001 | 230.0 (141.3 - 374.2) <.0001 | 117.3 (73.0 - 188.5) <.0001 | 127.3 (80.4 - 201.6) <.0001 | 138.2 (86.5 - 220.8) <.0001 | 150.0 (91.1 - 247.1) <.0001 |
| **63-72 mmol/mol (7.9-8.7%) - eGFR<60** | 270.3 (178.5 - 409.3) <.0001 | 226.4 (147.1 - 348.5) <.0001 | 264.3 (174.1 - 401.1) <.0001 | 308.5 (201.1 - 473.0) <.0001 | 360.0 (227.1 - 570.7) <.0001 | 178.2 (114.6 - 276.9) <.0001 | 193.4 (126.0 - 296.8) <.0001 | 209.9 (135.2 - 326.0) <.0001 | 227.9 (141.7 - 366.5) <.0001 |
| **73-82 mmol/mol (8.8-9.6%) - eGFR<60** | 460.9 (301.4 - 704.6) <.0001 | 387.9 (250.1 - 601.7) <.0001 | 452.8 (295.8 - 693.1) <.0001 | 528.5 (341.5 - 817.8) <.0001 | 616.9 (385.6 - 986.8) <.0001 | 299.9 (191.0 - 471.0) <.0001 | 325.6 (209.9 - 505.0) <.0001 | 353.4 (225.2 - 554.7) <.0001 | 383.7 (236.2 - 623.3) <.0001 |
| **>=83 mmol/mol (>=9.7%) - eGFR<60** | 1057.9 (690.5 - 1620.7) <.0001 | 898.2 (579.2 - 1392.9) <.0001 | 1048.3 (684.2 - 1606.4) <.0001 | 1223.6 (789.0 - 1897.6) <.0001 | 1428.2 (890.0 - 2291.8) <.0001 | 693.3 (442.0 - 1087.5) <.0001 | 752.6 (485.0 - 1167.8) <.0001 | 816.9 (519.4 - 1284.8) <.0001 | 886.9 (544.1 - 1445.5) <.0001 |
| Model 1: Adjusted for time-updated age and sex. Model 2: Adjusted for time-updated age, sex and time-updated diabetes duration centered at 30, 40, 50 and 60 years. Model 3: Adjusted for time-updated age, sex, born in Sweden, maximum education level, baseline comorbidities and time-updated diabetes duration centered at 30, 40, 50 and 60 years. | | | | | | | | | |

# *Supplement Table 12. Adjusted hazard ratios for Major amputation and 95% confidence intervals for time-updated mean HbA1c categories and Normoalbuminuria versus controls examined by Cox regression*

|  | **Hazard ratio (95% CI)** **p-value** | | | | | | | | |
| --- | --- | --- | --- | --- | --- | --- | --- | --- | --- |
|  | **Model 1** | **Model 2** | | | | **Model 3** | | | |
| **Amputation above ankle** | **All** | **Diabetes duration 30 years** | **Diabetes duration 40 years** | **Diabetes duration 50 years** | **Diabetes duration 60 years** | **Diabetes duration 30 years** | **Diabetes duration 40 years** | **Diabetes duration 50 years** | **Diabetes duration 60 years** |
| **Time updated mean HbA1c categories and Albuminuria** |  |  |  |  |  |  |  |  |  |
|  | 1.00 | 1.00 | 1.00 | 1.00 | 1.00 | 1.00 | 1.00 | 1.00 | 1.00 |
| **<=52 mmol/mol (<=6.9%) – Normoalbuminuria** | 9.3 (5.3 - 16.3) <.0001 | 6.1 (3.4 - 10.9) <.0001 | 8.3 (4.7 - 14.6) <.0001 | 11.3 (6.4 - 20.0) <.0001 | 15.4 (8.6 - 27.7) <.0001 | 5.6 (3.1 - 10.2) <.0001 | 7.3 (4.1 - 13.2) <.0001 | 9.5 (5.3 - 17.2) <.0001 | 12.4 (6.7 - 22.8) <.0001 |
| **53-62 mmol/mol (7.0-7.8%) – Normoalbuminuria** | 15.3 (10.7 - 22.0) <.0001 | 10.1 (6.9 - 14.8) <.0001 | 13.7 (9.5 - 19.7) <.0001 | 18.7 (12.9 - 27.0) <.0001 | 25.4 (17.1 - 37.8) <.0001 | 8.9 (6.0 - 13.1) <.0001 | 11.6 (8.0 - 16.7) <.0001 | 15.0 (10.3 - 21.9) <.0001 | 19.5 (13.0 - 29.3) <.0001 |
| **63-72 mmol/mol (7.9-8.7%) – Normoalbuminuria** | 19.0 (13.4 - 27.0) <.0001 | 12.8 (8.9 - 18.6) <.0001 | 17.5 (12.3 - 24.9) <.0001 | 23.8 (16.6 - 34.1) <.0001 | 32.4 (21.9 - 48.0) <.0001 | 11.1 (7.7 - 16.2) <.0001 | 14.5 (10.1 - 20.7) <.0001 | 18.8 (13.0 - 27.1) <.0001 | 24.4 (16.3 - 36.5) <.0001 |
| **73-82 mmol/mol (8.8-9.6%) – Normoalbuminuria** | 32.0 (20.8 - 49.0) <.0001 | 22.0 (14.2 - 34.2) <.0001 | 30.0 (19.6 - 46.0) <.0001 | 40.9 (26.5 - 63.1) <.0001 | 55.6 (35.1 - 88.3) <.0001 | 17.6 (11.3 - 27.4) <.0001 | 22.9 (14.9 - 35.2) <.0001 | 29.7 (19.1 - 46.1) <.0001 | 38.6 (24.1 - 61.7) <.0001 |
| **>=83 mmol/mol (>=9.7%) – Normoalbuminuria** | 131.2 (86.6 - 198.8) <.0001 | 94.5 (62.0 - 144.2) <.0001 | 128.7 (85.3 - 194.2) <.0001 | 175.2 (114.9 - 267.3) <.0001 | 238.6 (151.6 - 375.4) <.0001 | 71.7 (46.6 - 110.3) <.0001 | 93.2 (61.1 - 142.1) <.0001 | 121.0 (78.3 - 186.9) <.0001 | 157.2 (98.5 - 251.1) <.0001 |
| **<=52 mmol/mol (<=6.9%) - Not Normoalbuminuria** | 37.6 (22.1 - 64.2) <.0001 | 22.0 (12.6 - 38.6) <.0001 | 30.0 (17.5 - 51.5) <.0001 | 40.8 (23.8 - 69.9) <.0001 | 55.6 (32.0 - 96.5) <.0001 | 17.1 (9.7 - 30.1) <.0001 | 22.2 (12.9 - 38.4) <.0001 | 28.9 (16.7 - 49.8) <.0001 | 37.5 (21.4 - 65.8) <.0001 |
| **53-62 mmol/mol (7.0-7.8%)- Not Normoalbuminuria** | 59.5 (43.1 - 82.1) <.0001 | 35.4 (24.7 - 50.7) <.0001 | 48.2 (34.6 - 67.1) <.0001 | 65.6 (47.3 - 91.1) <.0001 | 89.3 (62.9 - 126.9) <.0001 | 25.9 (18.0 - 37.4) <.0001 | 33.7 (23.9 - 47.4) <.0001 | 43.7 (31.1 - 61.5) <.0001 | 56.8 (39.3 - 82.2) <.0001 |
| **63-72 mmol/mol (7.9-8.7%) - Not Normoalbuminuria** | 88.4 (66.7 - 117.1) <.0001 | 56.0 (40.9 - 76.7) <.0001 | 76.3 (57.3 - 101.6) <.0001 | 103.9 (77.8 - 138.8) <.0001 | 141.4 (102.5 - 195.3) <.0001 | 41.2 (29.9 - 56.8) <.0001 | 53.5 (39.7 - 72.0) <.0001 | 69.5 (51.3 - 94.1) <.0001 | 90.3 (64.3 - 126.7) <.0001 |
| **73-82 mmol/mol (8.8-9.6% ) - Not Normoalbuminuria** | 119.0 (87.9 - 161.2) <.0001 | 77.9 (56.1 - 108.1) <.0001 | 106.1 (78.2 - 143.9) <.0001 | 144.4 (105.8 - 197.1) <.0001 | 196.6 (139.3 - 277.5) <.0001 | 55.0 (39.4 - 76.9) <.0001 | 71.5 (52.1 - 98.1) <.0001 | 92.8 (67.0 - 128.6) <.0001 | 120.7 (84.0 - 173.3) <.0001 |
| **>=83 mmol/mol (>=9.7%) - Not Normoalbuminuria** | 312.4 (229.7 - 424.9) <.0001 | 210.7 (152.1 - 291.8) <.0001 | 286.9 (211.3 - 389.4) <.0001 | 390.6 (285.3 - 534.7) <.0001 | 531.8 (375.0 - 754.0) <.0001 | 139.2 (99.4 - 195.0) <.0001 | 180.9 (131.4 - 248.9) <.0001 | 234.8 (168.7 - 326.7) <.0001 | 305.2 (211.4 - 440.7) <.0001 |
| Model 1: Adjusted for time-updated age and sex. Model 2: Adjusted for time-updated age, sex and time-updated diabetes duration centered at 30, 40, 50 and 60 years. Model 3: Adjusted for time-updated age, sex, born in Sweden, maximum education level, baseline comorbidities and time-updated diabetes duration centered at 30, 40, 50 and 60 years. | | | | | | | | | |

# *Supplement Table 13. Adjusted hazard ratios for Major amputation and 95% confidence intervals for time-updated mean HbA1c categories and eGFR<60/>=60 categories versus the reference group examined by Cox regression*

|  | **Hazard ratio (95% CI)** **p-value** | | | | | | | | |
| --- | --- | --- | --- | --- | --- | --- | --- | --- | --- |
|  | **Model 1** | **Model 2** | | | | **Model 3** | | | |
| **Amputation above ankle** | **All** | **Diabetes duration 30 years** | **Diabetes duration 40 years** | **Diabetes duration 50 years** | **Diabetes duration 60 years** | **Diabetes duration 30 years** | **Diabetes duration 40 years** | **Diabetes duration 50 years** | **Diabetes duration 60 years** |
| **Time updated mean HbA1c categories and eGFR, n events=578, data used = 98.9%** |  |  |  |  |  |  |  |  |  |
| **Controls (reference)** | 1.00 | 1.00 | 1.00 | 1.00 | 1.00 | 1.00 | 1.00 | 1.00 | 1.00 |
| **<=52 mmol/mol (<=6.9%) - eGFR>=60** | 10.7 (6.4 - 18.0) <.0001 | 7.5 (4.4 - 12.8) <.0001 | 9.9 (5.9 - 16.7) <.0001 | 13.1 (7.7 - 22.1) <.0001 | 17.3 (10.0 - 29.9) <.0001 | 6.8 (3.9 - 11.7) <.0001 | 8.6 (5.0 - 14.8) <.0001 | 11.0 (6.4 - 19.0) <.0001 | 14.1 (8.0 - 24.8) <.0001 |
| **53-62 mmol/mol (7.0-7.8%) - eGFR>=60** | 17.5 (12.5 - 24.5) <.0001 | 12.1 (8.5 - 17.4) <.0001 | 16.0 (11.4 - 22.4) <.0001 | 21.2 (15.0 - 29.8) <.0001 | 27.9 (19.2 - 40.7) <.0001 | 10.3 (7.1 - 14.8) <.0001 | 13.1 (9.3 - 18.5) <.0001 | 16.8 (11.8 - 23.9) <.0001 | 21.4 (14.5 - 31.5) <.0001 |
| **63-72 mmol/mol (7.9-8.7%) - eGFR>=60** | 26.1 (19.2 - 35.4) <.0001 | 18.5 (13.4 - 25.6) <.0001 | 24.4 (18.0 - 33.1) <.0001 | 32.2 (23.5 - 44.1) <.0001 | 42.5 (29.9 - 60.5) <.0001 | 16.0 (11.5 - 22.2) <.0001 | 20.4 (15.0 - 27.9) <.0001 | 26.1 (18.9 - 36.0) <.0001 | 33.3 (23.2 - 47.8) <.0001 |
| **73-82 mmol/mol (8.8-9.6%) - eGFR>=60** | 34.0 (23.4 - 49.3) <.0001 | 24.6 (16.7 - 36.3) <.0001 | 32.5 (22.4 - 47.2) <.0001 | 42.9 (29.3 - 62.9) <.0001 | 56.7 (37.5 - 85.9) <.0001 | 19.4 (13.1 - 28.7) <.0001 | 24.8 (17.0 - 36.2) <.0001 | 31.7 (21.5 - 46.7) <.0001 | 40.4 (26.5 - 61.8) <.0001 |
| **>=83 mmol/mol (>=9.7%) - eGFR>=60** | 115.9 (79.2 - 169.7) <.0001 | 88.2 (59.9 - 129.8) <.0001 | 116.4 (79.9 - 169.7) <.0001 | 153.7 (104.0 - 227.2) <.0001 | 202.9 (132.4 - 311.0) <.0001 | 67.3 (45.3 - 99.8) <.0001 | 85.9 (58.4 - 126.3) <.0001 | 109.6 (73.4 - 163.8) <.0001 | 140.0 (90.2 - 217.2) <.0001 |
| **<=52 mmol/mol (<=6.9%) - eGFR<60** | 35.8 (20.3 - 63.1) <.0001 | 21.9 (12.1 - 39.8) <.0001 | 29.0 (16.3 - 51.5) <.0001 | 38.3 (21.6 - 67.7) <.0001 | 50.5 (28.2 - 90.6) <.0001 | 17.2 (9.4 - 31.2) <.0001 | 21.9 (12.3 - 39.1) <.0001 | 28.0 (15.7 - 49.8) <.0001 | 35.7 (19.7 - 64.6) <.0001 |
| **53-62 mmol/mol (7.0-7.8%) - eGFR<60** | 54.9 (38.6 - 78.3) <.0001 | 34.4 (23.2 - 50.9) <.0001 | 45.4 (31.6 - 65.4) <.0001 | 60.0 (41.8 - 86.0) <.0001 | 79.2 (54.0 - 116.1) <.0001 | 24.6 (16.5 - 36.7) <.0001 | 31.4 (21.6 - 45.7) <.0001 | 40.1 (27.6 - 58.3) <.0001 | 51.2 (34.5 - 76.2) <.0001 |
| **63-72 mmol/mol (7.9-8.7%) - eGFR<60** | 90.0 (65.9 - 122.9) <.0001 | 58.8 (41.6 - 83.1) <.0001 | 77.6 (56.4 - 106.8) <.0001 | 102.5 (74.4 - 141.1) <.0001 | 135.3 (95.5 - 191.7) <.0001 | 39.4 (27.6 - 56.4) <.0001 | 50.4 (36.1 - 70.2) <.0001 | 64.3 (45.9 - 90.0) <.0001 | 82.1 (56.8 - 118.5) <.0001 |
| **73-82 mmol/mol (8.8-9.6%) - eGFR<60** | 158.8 (114.4 - 220.5) <.0001 | 105.4 (73.7 - 150.7) <.0001 | 139.2 (99.8 - 194.1) <.0001 | 183.7 (131.4 - 256.9) <.0001 | 242.6 (168.5 - 349.3) <.0001 | 69.0 (47.7 - 99.9) <.0001 | 88.1 (62.3 - 124.8) <.0001 | 112.5 (79.1 - 160.0) <.0001 | 143.6 (97.9 - 210.7) <.0001 |
| **>=83 mmol/mol (>=9.7%) - eGFR<60** | 381.8 (273.1 - 533.7) <.0001 | 257.6 (179.6 - 369.5) <.0001 | 340.1 (242.7 - 476.6) <.0001 | 448.9 (319.2 - 631.3) <.0001 | 592.8 (409.2 - 858.8) <.0001 | 166.2 (114.5 - 241.4) <.0001 | 212.3 (149.3 - 301.9) <.0001 | 271.0 (189.4 - 387.6) <.0001 | 346.0 (234.3 - 510.8) <.0001 |
| Model 1: Adjusted for time-updated age and sex. Model 2: Adjusted for time-updated age, sex and time-updated diabetes duration centered at 30, 40, 50 and 60 years. Model 3: Adjusted for time-updated age, sex, born in Sweden, maximum education level, baseline comorbidities and time-updated diabetes duration centered at 30, 40, 50 and 60 years. | | | | | | | | | |
